# Supplementary material
Source: PubMed Central journal article supplement (PMC7376554)
Supplement: AEM.00441-20-s0001.pdf [file AEM.00441-20-s0001.pdf]

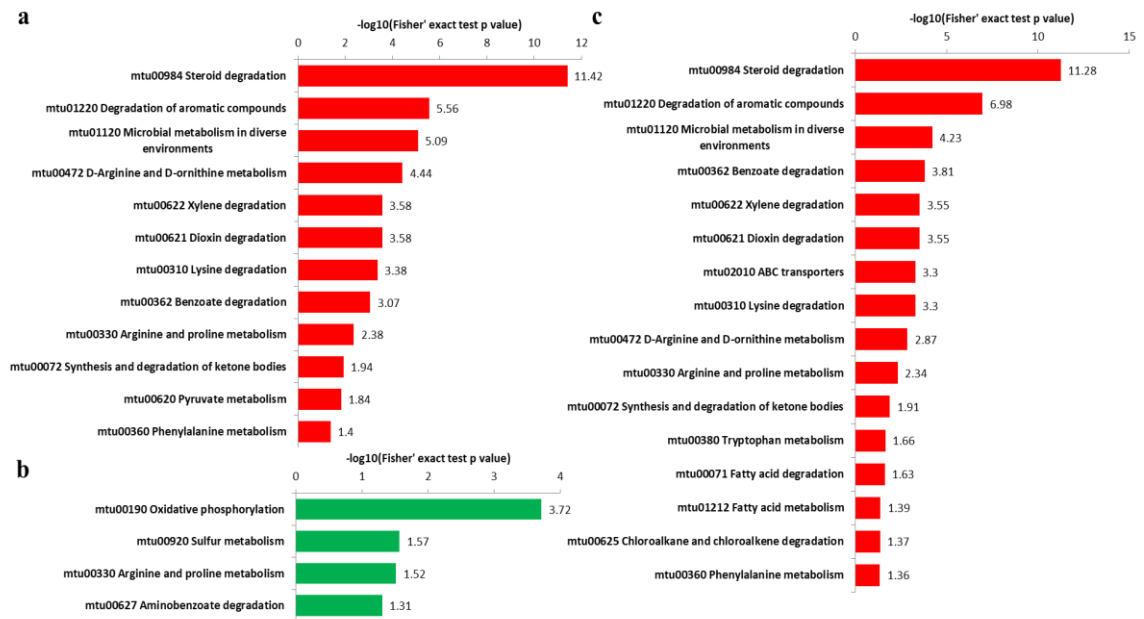

**FIG S1** KEGG pathway analysis of the *MNR* orthologs of differentially expressed proteins. KEGG pathway analysis of up-regulated proteins in MP vs. M test (**a**); KEGG pathway analysis of down-regulated proteins in MP vs. M test (**b**); and KEGG pathway analysis of the differentially expressed proteins in MPC vs. MP test (**c**).
